# Supplementary material for: Specific recognition and sensitive quantification of mRNA splice variants via one-pot ligation-dependent loop-mediated isothermal amplification
Source: Royal Society of Chemistry journal article supplement (doi:10.1039/d3an01382k), 2023-01-01
Supplement: d3an01382k1.pdf [file d3an01382k1.pdf]

## Electronic Supplementary Information

# Specific recognition and sensitive quantification of mRNA splice variants *via* one-pot ligation-depended loop-mediated isothermal amplification

Mai Zhang,<sup>a</sup> Hui Wang,<sup>a\*</sup> Jun Han,<sup>b</sup> Honghong Wang,<sup>a</sup> Yuting Jia,<sup>a</sup> Weixiang Hong,<sup>a</sup> Fu Tang,<sup>c</sup> and Zhengping Li<sup>a\*</sup>

<sup>a</sup> Beijing Key Laboratory for Bioengineering and Sensing Technology; School of Chemistry and Biological Engineering, University of Science and Technology Beijing, 30 Xueyuan Road, Haidian District, Beijing 100083, China.

<sup>b</sup> National Textile and Leather Product Quality Inspection and Testing Centre, 15 Xi Li-Ba Li Zhuang, Chaoyang District, Beijing 100025, China

<sup>c</sup> School of Materials Science and Engineering, University of Science and Technology Beijing, 30 Xueyuan Road, Haidian District, Beijing 100083, China

\*Corresponding Author: [winscavin@ustb.edu.cn](mailto:winscavin@ustb.edu.cn); [lzpbd@ustb.edu.cn](mailto:lzpbd@ustb.edu.cn)

**List of Contents:**

|                                                                                                                             |           |
|-----------------------------------------------------------------------------------------------------------------------------|-----------|
| <b>1. The sequences of the nucleic acids used in this assay.....</b>                                                        | <b>3</b>  |
| <b>2. The experimental procedures of two-step ligation-LAMP-based mRNA splicing variants assay.....</b>                     | <b>3</b>  |
| <b>3. Optimization of the experimental conditions and procedures.....</b>                                                   | <b>4</b>  |
| <b>3.1 Concentration of stem-loop DNA probe.....</b>                                                                        | <b>4</b>  |
| <b>3.2 Amount of SplintR ligase.....</b>                                                                                    | <b>5</b>  |
| <b>3.3 Ligation reaction time.....</b>                                                                                      | <b>6</b>  |
| <b>3.4 Temperature of the ligation reaction.....</b>                                                                        | <b>7</b>  |
| <b>4. Analytical performance comparison of two-step and one-step ligation-LAMP-based assay.....</b>                         | <b>8</b>  |
| <b>5. No specific amplification evaluation.....</b>                                                                         | <b>9</b>  |
| <b>6. Comparison of the performance of one-step ligation-LAMP with other methods for mRNA splice variants analysis.....</b> | <b>10</b> |
| <b>7. Quantification results of the hTERT splicing variants in total RNA and spiked RNA samples.....</b>                    | <b>12</b> |

## 1. The sequences of the nucleic acids used in this assay.

**Table S1.** The sequences of the nucleic acids used in this assay.

| Name               | Sequence (5'-3' direction)                                                                           |
|--------------------|------------------------------------------------------------------------------------------------------|
| $\alpha$ -deletion | CCGCCUGAGCUGUACUUUGUCAAGGACAGGCUCACGGAG<br>GUCAUCGCC                                                 |
| $\beta$ -deletion  | GUCCGCAAGGCCUUCAAGAGCCACGUCCUACGUCCAGUG<br>CCAGGGGAU                                                 |
| $\gamma$ -deletion | CACCCACGCGAAAACCUUCCUCAGCUAUGCCCGGACCUC<br>AUCAGAGC                                                  |
| P1 $_{\alpha}$     | /PO <sub>4</sub> /CTTGACAAAGTACAGCTCAGTTTATCGTCGTGACTGTT<br>TGTAATAGGACAGAGCCCCGCACTTTCAGTCACGACGAT  |
| P2 $_{\alpha}$     | CGACAGCAGAGGATTTGTTGTGTGGATATCTGAGCGGATTT<br>TCCTCTGCTGTCGTTTATGACCTCCGTGAGCCTGTC                    |
| P1 $_{\beta}$      | /PO <sub>4</sub> /GTGGCTCTTGAAGGCCTTGCTTTATCGTCGTGACTGTT<br>TGTAATAGGACAGAGCCCCGCACTTTCAGTCACGACGAT  |
| P2 $_{\beta}$      | CGACAGCAGAGGATTTGTTGTGTGGATATCTGAGCGGATTT<br>TCCTCTGCTGTCGTTTCTGGCACTGGACGTAGGAC                     |
| P1 $_{\gamma}$     | /PO <sub>4</sub> /CTGAGGAAGGTTTTTCGCGTGTTTATCGTCGTGACTGTT<br>TGTAATAGGACAGAGCCCCGCACTTTCAGTCACGACGAT |
| P2 $_{\gamma}$     | CGACAGCAGAGGATTTGTTGTGTGGATATCTGAGCGGATTT<br>TCCTCTGCTGTCGTTTTGATGGAGGTCCGGGCATAG                    |
| U-FIP              | ATCGTCGTGACTGAAAGTGCGGGGCTCTGTCCTATTAC                                                               |
| U-BIP              | CGACAGCAGAGGATTTGTTGTGTGGATATCTGAGCGGA                                                               |

**Notes:** /PO<sub>4</sub>/ indicates the phosphate group.

## 2. The experimental procedures of two-step ligation-LAMP-based mRNA splicing variants assay

The ligation reaction mixture consisted of 1  $\mu$ L mRNA splice variants or 1  $\mu$ L total RNA samples, 1  $\mu$ L 1 nM stem-loop DNA probe 1 (P1), 1  $\mu$ L 1 nM stem-loop DNA probe 2 (P2), 1.0  $\mu$ L 10  $\times$  SplintR ligase reaction buffer, 0.1  $\mu$ L 25 U/ $\mu$ L SplintR ligase, 5.9  $\mu$ L RNase-free water. Before testing, the RNA samples, P1 and P2 probes were annealed at 65  $^{\circ}$ C for 5 minutes and incubated at 35  $^{\circ}$ C for 5 minutes.

The ligation reaction mixture was incubated at 35 °C for 20 minutes to perform the ligation reaction.

2  $\mu\text{L}$  ligation product was added to 8  $\mu\text{L}$  LAMP amplification solution which included 0.5  $\mu\text{L}$  8 U/ $\mu\text{L}$  *Bst* DNA polymerase, 1.0  $\mu\text{L}$  10 $\times$  ThermoPol reaction buffer, 1.0  $\mu\text{L}$  2.5 mM dNTPs, 0.4  $\mu\text{L}$  20  $\mu\text{M}$  U-FIP, 0.4  $\mu\text{L}$  10  $\mu\text{M}$  UBIP, 0.2  $\mu\text{L}$  20 $\times$  SYBR Green I, and 4.5  $\mu\text{L}$  RNase-free water. The LAMP amplification reaction was performed in StepOne real-time quantitative PCR system under 65 °C, and the real-time quantitative fluorescence signals were monitored once per minute.

### **3. Optimization of the experimental conditions and procedures.**

#### **3.1 Concentration of stem-loop DNA probe.**

By using two-step ligation-LAMP, the experimental conditions of the ligation reaction, including the concentration of stem-loop DNA probes, the dosage of SplintR ligase, and the reaction time and temperature of ligation have been investigated.

Firstly, we investigated the influence of probes (P1 and P2) concentration on the assay by detecting 10 fM, 100 fM, and 1 pM synthetic  $\alpha$ -deletion splicing variant RNA with different probe concentrations. As results shown in Fig. S1, when the probe concentration decreased from 1 nM to 10 pM, the reaction speed gradually reduced, especially when the probe concentration dropped to 10 pM, and the ligation reaction efficiency was too low. However, too high probe concentrations may aggravate non-specific ligation, such as 1 nM probe concentration. Considering the ligation specificity and efficiency, the probe concentration of 100 pM was selected as the optimal condition for this ligation-LAMP assay.

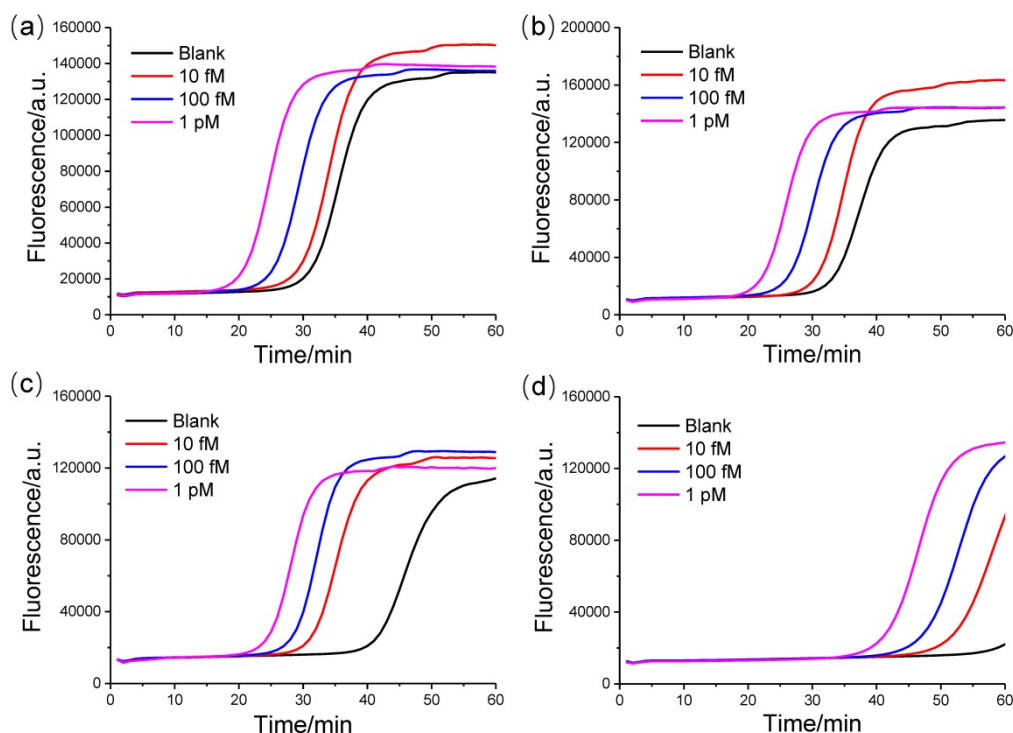

**Fig. S1.** Effect of the probes (P1 and P2) concentration on the ligation-LAMP assay. The probes concentration was 1 nM (a), 500 pM (b), 100 pM (c), and 10 pM (d), respectively. The blank control was treated with the same procures but without any splice variant.

### 3.2 Amount of SplintR ligase.

To investigate the effect of the amount of SplintR ligase on the ligation-LAMP-based assay, 10 fM, 100 fM, and 1 pM synthetic  $\alpha$ -deletion splicing variant RNA were tested with different amounts of SplintR ligase. As exhibited in Fig. S2, by increasing the amount of SplintR ligase from 1.25U to 5 U, the reaction efficiency was gradually accelerated. However, when the dosage of SplintR ligase increased to 5 U, it was observed that the fluorescence curve of the blank showed a growing trend, indicating that the increased dosage of SplintR ligase may aggravate the non-specific ligation. In contrast, there was no significant difference between the SplintR ligase dosage of 2.5 U and 3.75 U. Finally, 2.5 U was chosen for further studies.

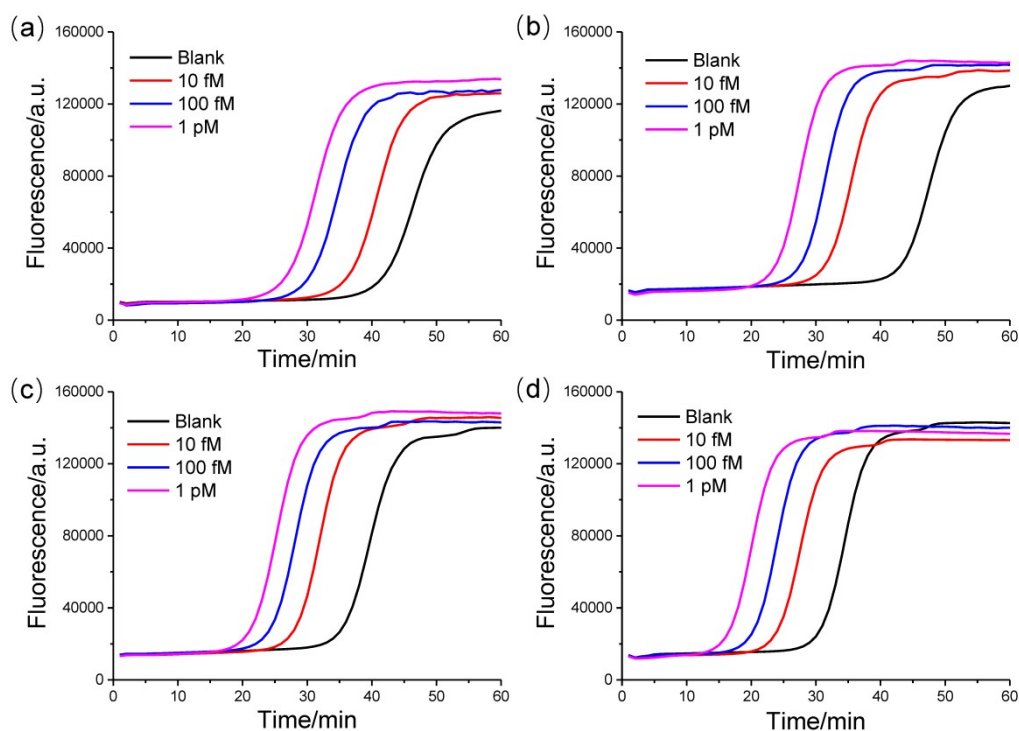

**Fig. S2.** Effect of the SplintR ligase dosage on the ligation-LAMP. The SplintR ligase dosage was 1.25 U (a), 2.5 U (b), 3.75 U (c), and 5 U (d), respectively. The blank control was treated with the same procures but without any splice variant.

### 3.3 Ligation reaction time.

Next, we investigated the influence of ligation time on the ligation-LAMP-based assay. The ligation times, including 15 min, 20 min, 25 min, and 30 min, were respectively used to detect 10 fM, 100 fM, and 1 pM synthetic  $\alpha$ -deletion splicing variant RNA. As illustrated in Fig. S3, when the ligation time was extended from 15 min to 30 min, the reaction speed gradually increased, but the longer reaction time of ligation may increase the risk of template-independent ligation. Considering the reaction speed and ligation specificity, 20 min ligation time was chosen as the best condition.

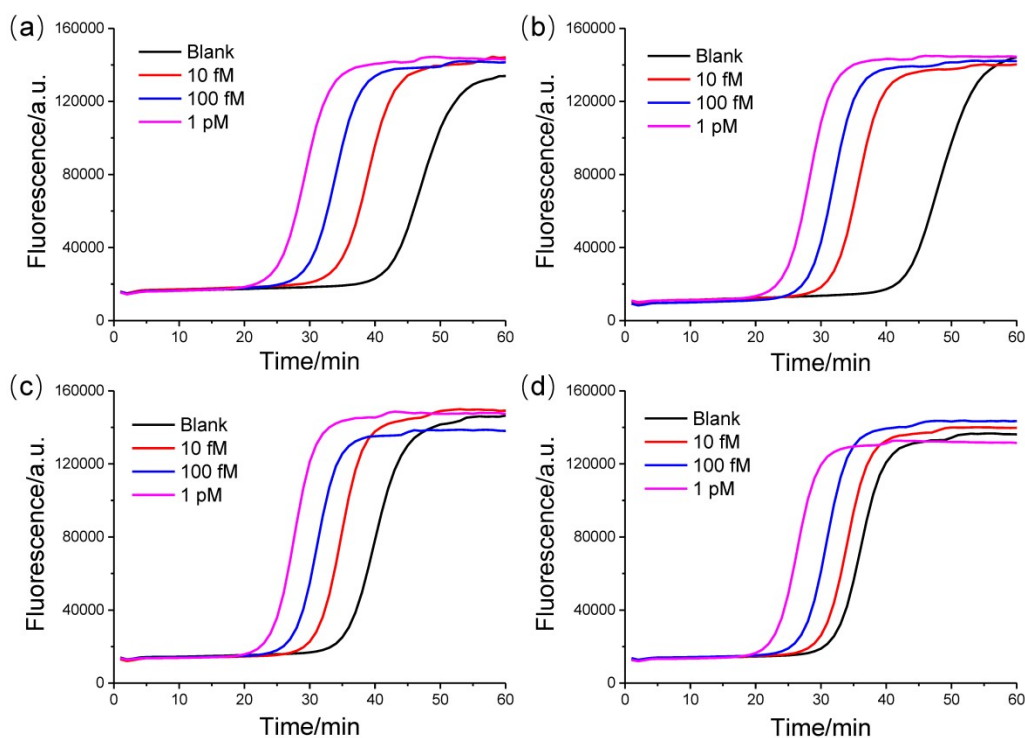

**Fig. S3** Effect of the ligation reaction time on the ligation-LAMP assay. The probe concentration was 15 min (a), 20 min (b), 25 min (c), and 30 min (d), respectively. The blank control was treated with the same procures but without any splice variant.

### 3.4 Temperature of the ligation reaction.

The temperature of the ligation reaction largely affects the activity of SplintR ligase. To investigate the effect of ligation temperature on splice variant detection, the ligation-LAMP was performed by using the following temperatures, 16 °C, 25 °C, 35 °C, and 40 °C. As shown in Fig. S4, with increasing the ligation reaction temperature from 16 °C to 40 °C, there was no significant difference in the reaction efficiency. but when the ligation temperature was 25 °C, the nonspecific ligation of the probes (P1 and P2) was least significant. Finally, 35 °C was selected as the reaction temperature in this work.

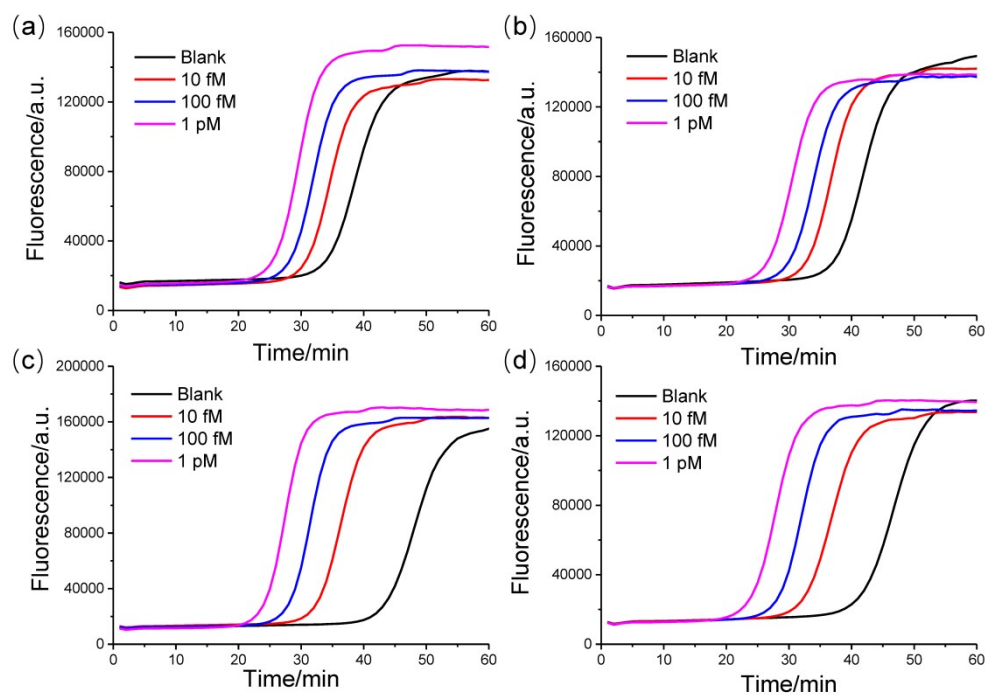

**Fig. S4.** Effect of the ligation reaction temperature on the ligation-LAMP assay. The ligation temperature was 16 °C (a), 25 °C (b), 35 °C (c), and 40 °C (d), respectively. The blank control was treated with the same procures but without any splice variant.

#### 4. Analytical performance comparison of two-step and one-step ligation-LAMP-based assay.

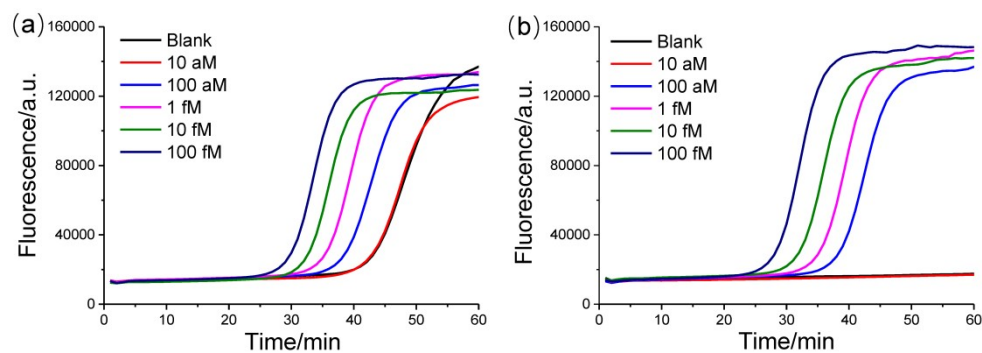

**Fig. S5** Analytical performance comparison of two-step (a) and one-pot (b) ligation-LAMP-based assay. (a) Real-time fluorescence curves produced by blank 0 (without any splice variant), 10 aM, 100 aM, 1 fM, 10 fM, and 100 fM synthetic  $\alpha$ -deletion splicing variant by two-step ligation-LAMP assay. (b) Real-time fluorescence curves produced by blank, 10 aM, 100 aM, 1 fM, 10 fM, and 100 fM synthetic  $\alpha$ -deletion splicing variant by one-pot ligation-LAMP assay.



## 5. No specific amplification evaluation.

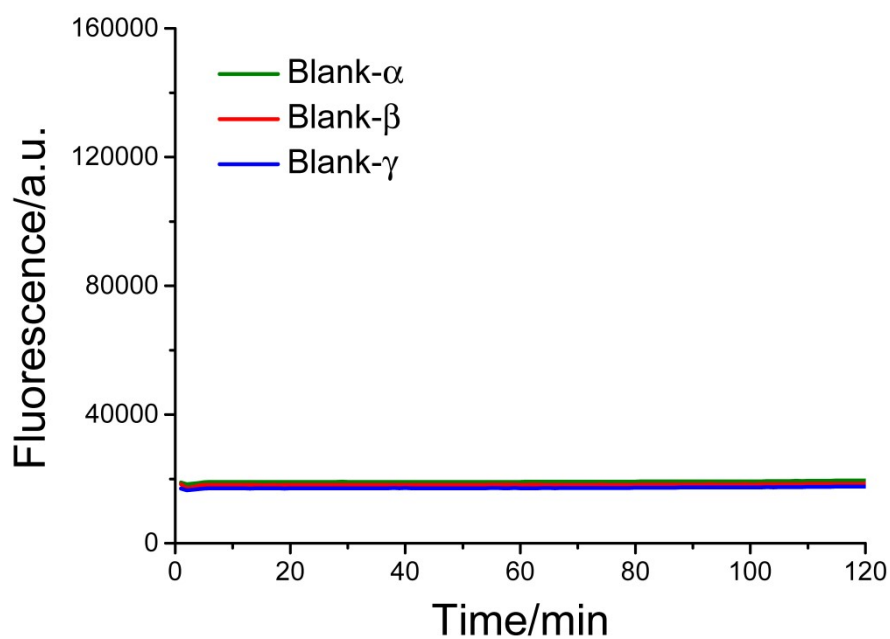

**Fig. S6.** No specific amplification evaluation of the one-pot ligation-LAMP assay. The real-time fluorescence curves were produced by blank control (without any splice variant) with P1<sub>α</sub> and P2<sub>α</sub> (Blank-α), P1<sub>β</sub> and P2<sub>β</sub> (Blank-β), and P1<sub>γ</sub> and P2<sub>γ</sub> (Blank-γ) within 120 min.

## 6. Comparison of the performance of one-step ligation-LAMP with other methods for mRNA splice variants analysis.

**Table S2.** Comparison of the performance of one-step ligation-LAMP with other methods for mRNA splice variants analysis.

| Method           | Number of enzymes | Experimental processes | Preparation process and time of sensors         | Analysis time                       | Dynamic range          | Sensitivity                               | Ref |
|------------------|-------------------|------------------------|-------------------------------------------------|-------------------------------------|------------------------|-------------------------------------------|-----|
| Plasmonic ISH    | No need           | Multiple operations    | Complex, >24 h                                  | ~ 1 h                               | N/A                    | 1 copy                                    | [1] |
| SPR biosensor    | 1                 | Multiple operations    | No need                                         | ~ 2 h                               | 0 pM–50 nM             | 387 pM                                    | [2] |
| RETF probe assay | No need           | Multiple operations    | Complex, >24 h                                  | ~ 0.5 h                             | N/A                    | 50 nM                                     | [3] |
| SpliceRCA        | 2                 | Multiple operations    | No need (in viro);<br>Complex, ~ 17 h (in situ) | 3 h (in viro);<br>~ 0.5 h (in situ) | 10 pM-100 nM (in viro) | 10 pM (in viro);<br>single cell (in situ) | [4] |
| EJNC probe assay | No need           | Multiple operations    | Complex, > 24 h                                 | 1 h                                 | N/A                    | Single cell                               | [5] |
| RNA-primed RCA   | 5                 | Multiple operations    | Complex, > 24 h                                 | 1 h                                 | N/A                    | Single cell                               | [6] |

|                       |   |                     |         |         |               |        |           |
|-----------------------|---|---------------------|---------|---------|---------------|--------|-----------|
| RCA                   | 3 | Multiple operations | No need | ~ 3.3 h | 100 fM–20 pM. | 29 fM  | [7]       |
| Ligation-PCR          | 2 | Multiple operations | No need | ~ 1.5 h | 100 aM-100 pM | 100 aM | [8,9]     |
| RT-PCR                | 2 | Multiple operations | No need | ~ 2 h   | 100 aM-100 pM | 100 aM | [10-12]   |
| RT-LAMP               | 3 | Multiple operations | No need | ~ 3 h   | 100 aM-100 pM | 100 aM | [13]      |
| One-pot ligation-LAMP | 2 | All in one-pot      | No need | 1.5 h   | 100 aM-100 pM | 100 aM | This work |

**Notes:**

ISH: fluorescence in situ hybridization.

SPR: surface plasmon resonance.

RETF: reduction-triggered fluorescence.

SpliceRCA: splice-junction anchored padlock-probe-mediated rolling circle amplification.

EJNC: exon-exon junction.

RT-PCR: reverse transcription-polymerase chain reaction.

N/A: Not available.

**7. Quantification results of the hTERT splicing variants in total RNA and spiked RNA samples.**

**Table S3.** Quantification results of the hTERT splicing variants in total RNA and spiked RNA samples.

| Cell lines | Splice variants    | Sample (n=3)              | Average (zmol) | Recovery (%) |
|------------|--------------------|---------------------------|----------------|--------------|
| HeLa       | $\alpha$ -deletion | 10 ng total RNA           | 6.8            | 90.3         |
|            |                    | 10 ng total RNA+ 30 zmol  | 33.9           |              |
|            | $\beta$ -deletion  | 10 ng total RNA           | 3.8            | 103.0        |
|            |                    | 10 ng total RNA + 20 zmol | 24.4           |              |
|            | $\gamma$ -deletion | 10 ng total RNA           | 0.7            | 103.3        |
|            |                    | 10 ng total RNA + 3 zmol  | 3.8            |              |
| A549       | $\alpha$ -deletion | 10 ng total RNA           | 4.9            | 89.3         |
|            |                    | 10 ng total RNA + 30 zmol | 31.7           |              |
|            | $\beta$ -deletion  | 10 ng total RNA           | 1.2            | 106.0        |
|            |                    | 10 ng total RNA + 5 zmol  | 6.5            |              |
|            | $\gamma$ -deletion | 10 ng total RNA           | 0              | 91.0         |
|            |                    | 10 ng total RNA + 10 zmol | 9.1            |              |
| K562       | $\alpha$ -deletion | 10 ng total RNA           | 1.8            | 109.0        |
|            |                    | 10 ng total RNA + 10 zmol | 12.7           |              |
|            | $\beta$ -deletion  | 10 ng total RNA           | 0.7            | 106.0        |
|            |                    | 10 ng total RNA + 3 zmol  | 3.9            |              |
|            | $\gamma$ -deletion | 10 ng total RNA           | 0.4            | 105.0        |
|            |                    | 10 ng total RNA + 2 zmol  | 2.5            |              |
| MRC-5      | $\alpha$ -deletion | 10 ng total RNA           | 2.2            | 107.0        |
|            |                    | 10 ng total RNA + 10 zmol | 12.9           |              |
|            | $\beta$ -deletion  | 10 ng total RNA           | 1.1            | 96.0         |
|            |                    | 10 ng total RNA + 5 zmol  | 5.9            |              |
|            | $\gamma$ -deletion | 10 ng total RNA           | 0.6            | 90.0         |
|            |                    | 10 ng total RNA + 3 zmol  | 3.3            |              |

## Reference

1. K. Lee, Y. Cui, L. P. Lee and J. Irudayaraj, *Nat. Nanotechnol.*, 2014, **9**, 474-480.
2. C. S. Huertas, S. Bonnal, M. Soler, A. M. Escuela, J. Valcárcel and L. M. Lechuga, *Anal. Chem.*, 2019, **91**, 15138-15146.
3. Y. Tamura, K. Furukawa, R. Yoshimoto, Y. Kawai, M. Yoshida, S. Tsuneda, Y. Ito and H. Abe, *Bioorg. Med. Chem. Lett.*, 2012, **22**, 7248-7251.
4. X. Ren, R. Deng, K. Zhang, Y. Sun, X. Teng and J. Li, *ACS Cent. Sci.*, 2018, **4**, 680-687.
5. S. Wang, X. Ma, Z. Yang, X. Zhang, X. Chen, Y. Xia, X. Gao and X. Ren, *Anal. Chem.*, 2022, **94**, 5014-5022.
6. X. Cao, H. Yu, J. Xue, M. Bai, Y. Zhao, Y. Li, Y. Zhao and F. Chen, *Anal. Chem.*, 2020, **92**, 9356-9361.
7. X. Ren, R. Deng, L. Wang, K. Zhang and J. Li, *Chem. Sci.*, 2017, **8**, 5692-5698.
8. H. Wang, H. Wang, X. Duan, Y. Sun, X. Wang and Z. Li, *Chem. Sci.*, 2017, **8**, 3635-3640.
9. Y. Jia, J. Han, H. Wang, W. Hong, H. Wang, M. Zhang and Z. Li, *Chem. Commun.*, 2021, **57**, 10011-10014.
10. J. Wang, W. P. Wong, E. O. Link, S. Olivares, C. T. Adelman, A. S. Henkel and M. El Muayed, *Biology Methods and Protocols*, 2021, **6**, bpab002.
11. J.-P. Brosseau, J.-F. Lucier, E. Lapointe, M. Durand, D. Gendron, J. Gervais-Bird, K. Tremblay, J.-P. Perreault, S.A. Elela, *RNA*, 2010, **16**, 442-449.
12. Y. Jia, H. Wang, H. Wang, F. Wang, K. Gao and Z. Li, *Analyst*, 2023, **148**, 3341-3346.
13. F. Su, G. Wang, J. Ji, P. Zhang, F. Wang and Z. Li, *RSC Adv.*, 2020, **10**, 6271-6276.
